# Supplementary material for: Above room temperature spin crossover in thioamide-functionalised 2,6-bis(pyrazol-1-yl)pyridine iron(ii) complexes
Source: Royal Society of Chemistry journal article supplement (doi:10.1039/c8dt03240h), 2018-11-14
Supplement: c8dt03240h1.pdf [file c8dt03240h1.pdf]

## Supplementary Data

### Above Room Temperature Spin Crossover in Thioamide-Functionalised 2,6-bis(pyrazol-1-yl)pyridine Iron(II) Complexes.

Max Attwood<sup>a</sup>, Hiroki, Akutsu<sup>b</sup>, Lee Martin<sup>c</sup>, Dyanne Cruickshack<sup>d</sup>, Scott S. Turner<sup>a</sup>

<sup>a</sup>Department of Chemistry, University of Surrey, Guildford, UK, GU2 7XH

<sup>b</sup>Department of Chemistry, Graduate School of Science, Osaka University, 1-1 Machikaneyama, Toyonaka, Osaka 560-0043, Japan

<sup>c</sup>School of Science and Technology, Nottingham Trent University, UK, NG1 4FQ

<sup>d</sup>Rigaku Europe, Unit 44, Monument Park, Chalgrove, Oxfordshire, UK, OX44 7RW.

List of supplementary data

#### Synthesis and characterisation of **bppCONH<sub>2</sub>** and **bppCONHMe**

**Figure.S1:** <sup>1</sup>H NMR (top) and <sup>13</sup>C NMR (bottom) of ligand **bppCSNH<sub>2</sub>**.

**Figure.S2:** <sup>1</sup>H NMR (top) and <sup>13</sup>C NMR (bottom) of **bppCSNHMe**.

**Figure.S3:** Picture of XRD mounted crystal of [Fe(**bppCSNHMe**)<sub>2</sub>](BF<sub>4</sub>)<sub>2</sub>.MeNO<sub>2</sub> taken at 330K (left) and 360K (right) showing change in colour and opacity due to irreversible loss of solvent.

**Figure.S4:** Diffraction patterns for [Fe(**bppCSNHMe**)<sub>2</sub>](BF<sub>4</sub>)<sub>2</sub>.MeNO<sub>2</sub> taken at 330K (left) and 360K (right) showing change in crystallinity.

**Figure.S5:** TGA trace for [Fe(**bppCSNH<sub>2</sub>**)<sub>2</sub>](BF<sub>4</sub>)<sub>2</sub>.2MeNO<sub>2</sub>

**Figure.S6:** DSC trace for [Fe(**bppCSNH<sub>2</sub>**)<sub>2</sub>](BF<sub>4</sub>)<sub>2</sub>.2MeNO<sub>2</sub> (top) and [Fe(**bppCSNH<sub>2</sub>**)<sub>2</sub>](ClO<sub>4</sub>)<sub>2</sub>.MeNO<sub>2</sub> (bottom), showing loss of solvent and no SCO

**Figure.S7:** TGA trace for [Fe(**bppCSNHMe**)<sub>2</sub>](BF<sub>4</sub>)<sub>2</sub>.0.5MeNO<sub>2</sub>

**Table S1:** CCDC numbers for crystal structures

### Synthesis and characterisation of bppCONH<sub>2</sub> and bppCONHMe

A solution of SOCl<sub>2</sub> (10 ml) and bppCOOH (0.893 g, 3.5 x 10<sup>-3</sup> mols) was reacted at 75°C for 4 hrs under reflux. The condenser was capped with a CaCl<sub>2</sub> tube. Excess SOCl<sub>2</sub> was removed *in vacuo* and the resulting brown solid was dissolved in THF (25 ml). This solution was slowly added to conc. NH<sub>4</sub>OH (bppCONH<sub>2</sub> synthesis) or NH<sub>2</sub>Me (bppCONHMe synthesis) in ethanol (33%, 5 ml) while stirring. The solution was sealed and left stirring at room temperature for 2 hrs. The solution was concentrated to ca. 5 ml *in vacuo* giving a brown slurry which was filtered and washed with water yielding a white solid which was dried in a vacuum desiccator. The solid was dissolved in the minimum volume of boiling methanol and left in the freezer at -20°C giving white needle crystals.

bppCONH<sub>2</sub> Yield: 0.716 g, (88%). <sup>1</sup>H NMR (400 MHz, DMSO): δ 8.99 (d, *J* = 2.6 Hz, 2H), 8.57 (s, 1H), 8.22 (s, 2H), 7.92 (d, *J* = 7.3 Hz, 2H), 7.88 (s, 1H), 6.67 (dd, *J* = 2.4 Hz, *J* = 1.8 Hz, 2H). <sup>13</sup>C NMR (400 MHz, DMSO): δ 165.62, 150.64, 148.41, 143.42, 128.84, 109.19, 107.55. MS (ESI, positive scan) *m/z* calculated = 255.0989 (M+H)<sup>+</sup>, 277.0808 (M+Na)<sup>+</sup>; Found = 255.0992 (M+H)<sup>+</sup>, 277.081 (M+Na)<sup>+</sup>.

bppCONHMe Yield: 0.797 g, (85%). <sup>1</sup>H NMR (400 MHz, DMSO): δ 9.09 (q, *J* = 4.3 Hz, 1H), 8.99 (d, *J* = 2.5 Hz, 2H), 8.21 (s, 2H), 7.92 (d, *J* = 1.1 Hz, 2H), 6.70 – 6.64 (m, 2H), 2.85 (d, *J* = 4.5 Hz, 3H). <sup>13</sup>C NMR (400 MHz, DMSO): δ 164.19, 150.66, 148.22, 143.45, 128.84, 109.21, 107.2, 26.95

# NMR Ligand Characterisation

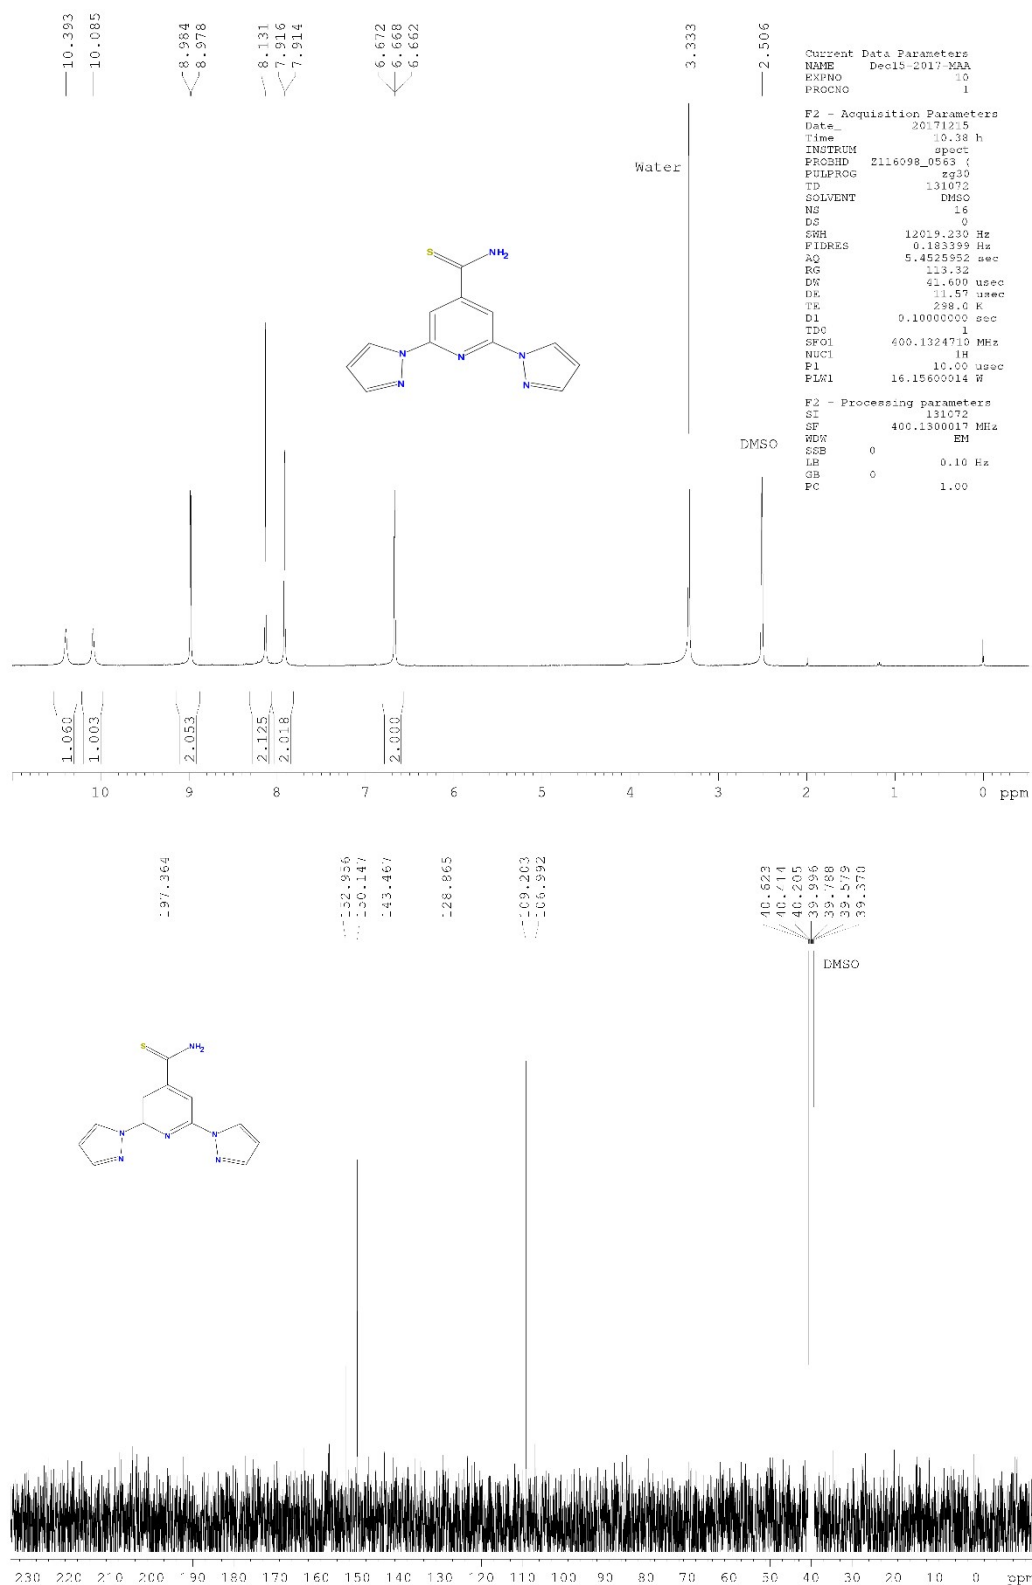

Figure.S1: <sup>1</sup>H NMR (top) and <sup>13</sup>C NMR (bottom) of bppsNH<sub>2</sub>.

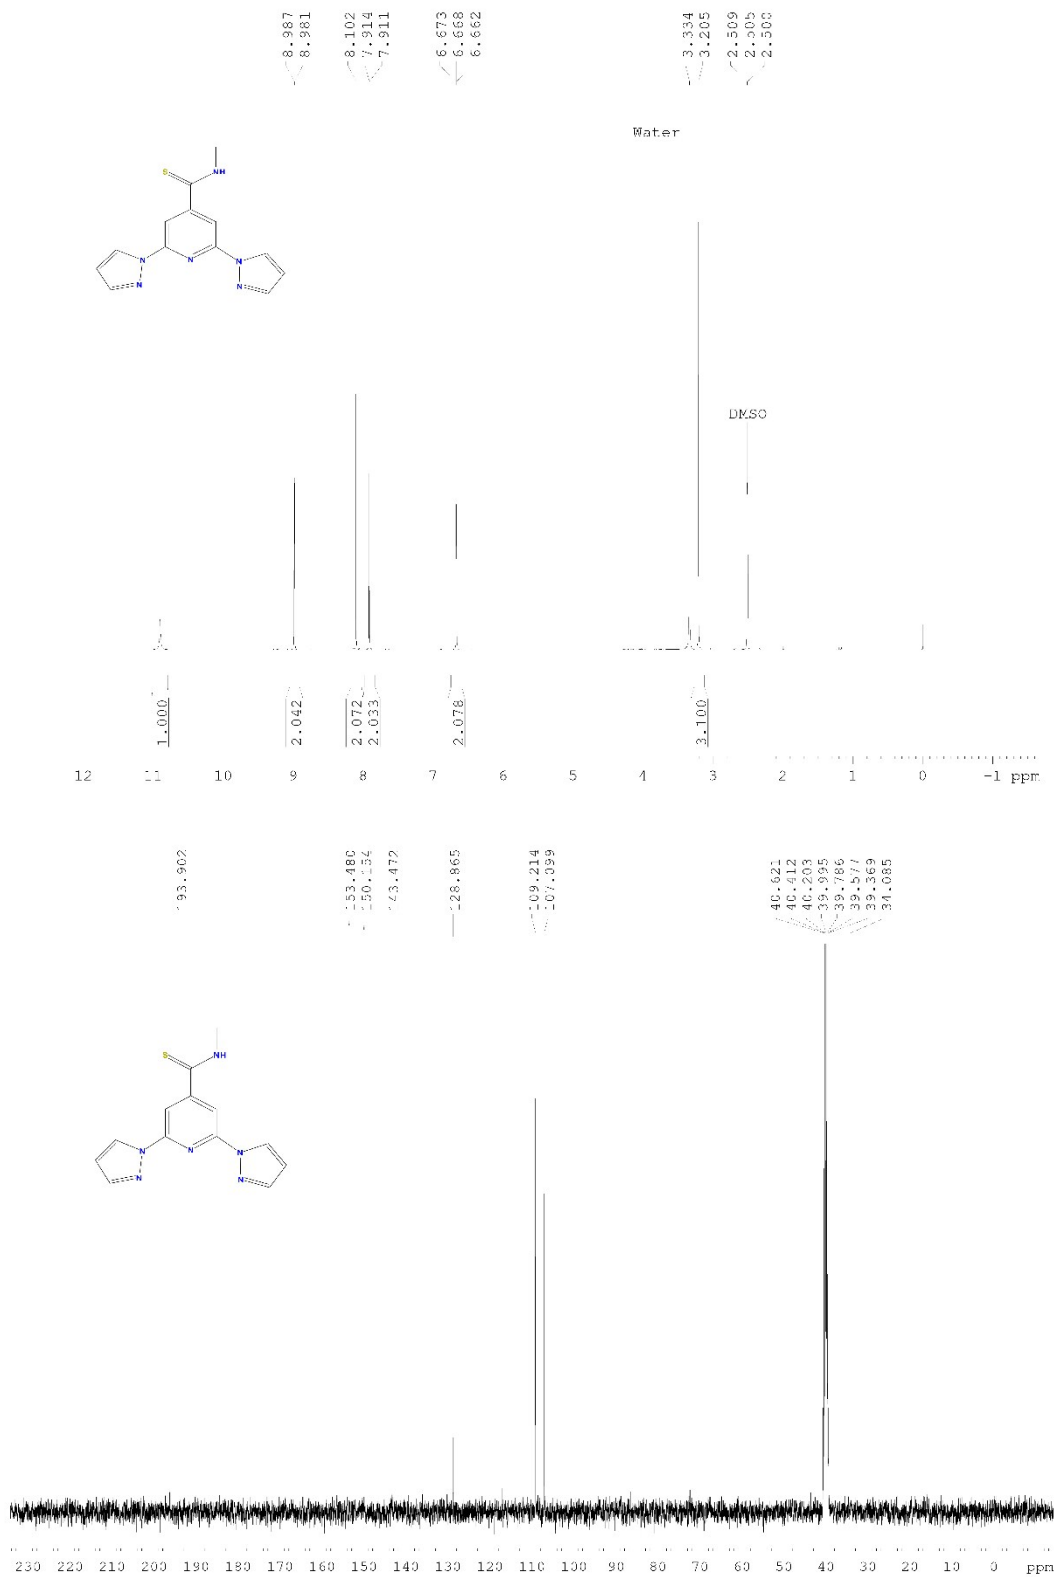

Figure.S2: <sup>1</sup>H NMR (top) and <sup>13</sup>C NMR (bottom) of bppCSNHMe.

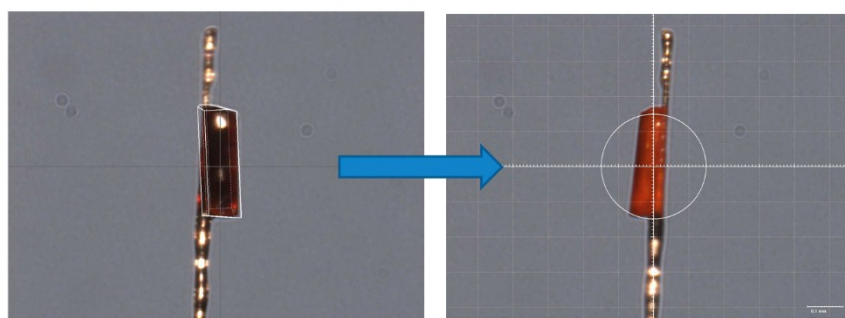

330 K

360 K – opaque, no longer crystalline

**Figure.S3:** Picture of XRD mounted crystal of  $[\text{Fe}(\text{bppCSNHMe})_2](\text{BF}_4)_2 \cdot \text{MeNO}_2$  taken at 330K (left) and 360K (right) showing change in colour and opacity due to irreversible loss of solvent.

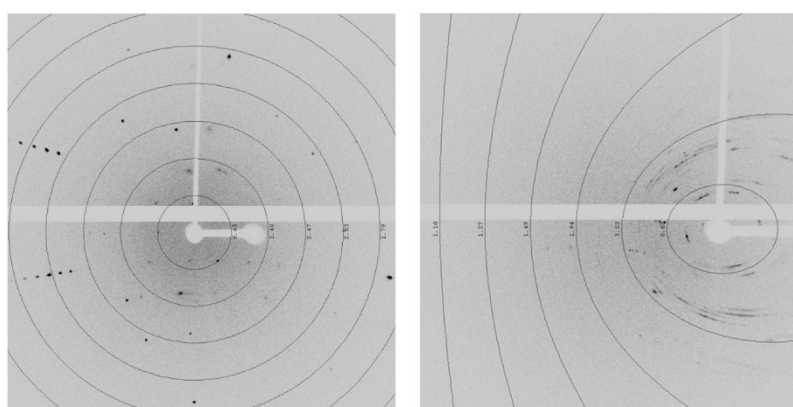

Good intensity observed

Poor diffraction

**Figure.S4:** Diffraction patterns for  $[\text{Fe}(\text{bppCSNHMe})_2](\text{BF}_4)_2 \cdot \text{MeNO}_2$  taken at 330K (left) and 360K (right) showing change in crystallinity.

## TGA and DSC Thermal Analysis

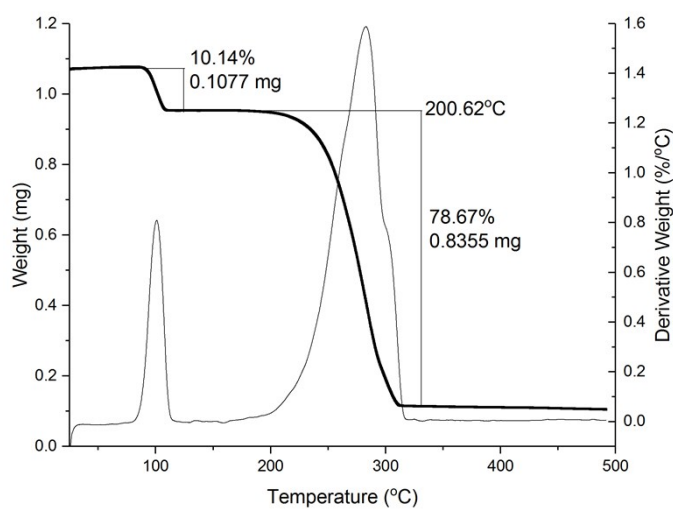

Figure.S5: TGA trace for  $[\text{Fe}(\text{bppCSNH}_2)_2](\text{BF}_4)_2 \cdot 2\text{MeNO}_2$

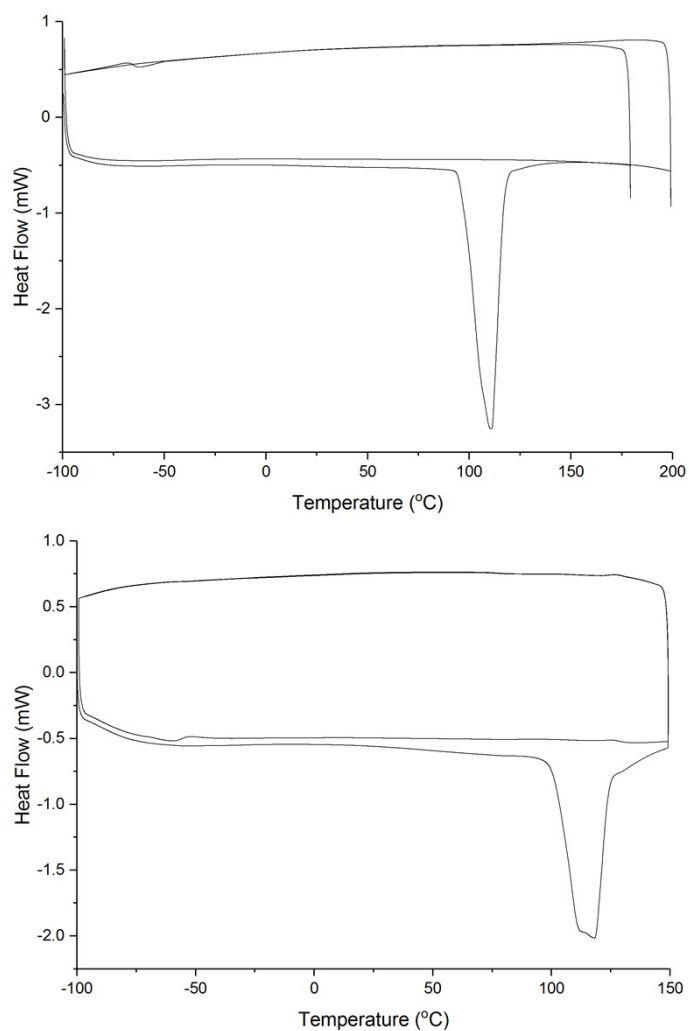

Figure.S6: DSC trace for  $[\text{Fe}(\text{bppCSNH}_2)_2](\text{BF}_4)_2 \cdot 2\text{MeNO}_2$  (top) and  $[\text{Fe}(\text{bppCSNH}_2)_2](\text{ClO}_4)_2 \cdot \text{MeNO}_2$  (bottom), showing loss of solvent and no SCO

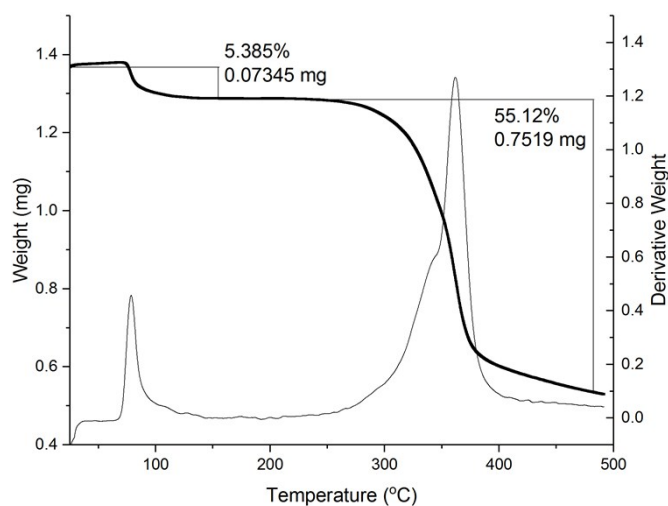

**Figure.S7:** TGA trace for  $[\text{Fe}(\text{bppCSNHMe})_2](\text{BF}_4)_2 \cdot 0.5\text{MeNO}_2$

**Table S1:** CCDC numbers for crystal structures submitted to Cambridge structural database

| Compound                                                                                              | CCDC    |
|-------------------------------------------------------------------------------------------------------|---------|
| <b>bppCSNH<sub>2</sub></b>                                                                            | 1860674 |
| <b>bppCSNHMe</b>                                                                                      | 1860675 |
| <b>[Fe(bppCSNH<sub>2</sub>)<sub>2</sub>](BF<sub>4</sub>)<sub>2</sub> · 2MeNO<sub>2</sub> at 100 K</b> | 1860676 |
| <b>[Fe(bppCSNH<sub>2</sub>)<sub>2</sub>](BF<sub>4</sub>)<sub>2</sub> · 2MeNO<sub>2</sub> at 290 K</b> | 1860677 |
| <b>[Fe(bppCSNHMe)<sub>2</sub>](BF<sub>4</sub>)<sub>2</sub> · MeNO<sub>2</sub> at 100 K</b>            | 1860678 |
| <b>[Fe(bppCSNHMe)<sub>2</sub>](BF<sub>4</sub>)<sub>2</sub> · MeNO<sub>2</sub> at 290 K</b>            | 1860679 |
| <b>[Fe(bppCSNHMe)<sub>2</sub>](BF<sub>4</sub>)<sub>2</sub> · MeNO<sub>2</sub> at 330 K</b>            | 1860680 |
| <b>[Fe(bppCSNHMe)<sub>2</sub>](ClO<sub>4</sub>)<sub>2</sub> at 102 K</b>                              | 1860681 |
| <b>[Fe(bppCSNHMe)<sub>2</sub>](ClO<sub>4</sub>)<sub>2</sub> at 290 K</b>                              | 1860682 |
| <b>[Fe(bppCSNHMe)<sub>2</sub>](ClO<sub>4</sub>)<sub>2</sub> at 370 K</b>                              | 1860683 |
